# Supplementary material for: Internal standards for 1 H NMR spectroscopy in concentrated sulfuric acid
Source: Royal Society of Chemistry journal article supplement (doi:10.1039/d5an00161g), 2025-01-01
Supplement: d5an00161g2.xlsx [file d5an00161g2.xlsx]

## Sheet: 01-Contents
Internal Standards for Quantitative 1H NMR Spectroscopy (qNMR) in Concentrated Sulfuric Acid in Concentrated Sulfuric Acid
by Desmond B. Ofosu, Robert Z. Mendoza & Paul J. Bracher
Source Data File – This file contains the data collected and analyzed within the paper
Sheet	Item	Description	Guidance to Reader
1	Table of Contents	This sheet lists the contents of this source data file. The entry for each sheet includes a brief description of its contents.	Brief explanations
2	Thermal Stability Test for the Eight Internal Standards	Peak integration data and analysis from stability test (to decomposition) of all candidates at 23, 50, 70, and 100 °C in concentrated sulfuric acid for 5 days	These are integrated values from NMR experiments at various temperatures
3	Further (Mixed) Thermal Stability Test for the Top Three Candidates	Peak integration data and analysis from stability testing of dimethyl sulfone, dinitrobenzene, and KHP at RT, 50, 70, and 100 °C in concentrated sulfuric acid for 7 days	These are integrated values from NMR experiments at various temperatures to see if the ratios of the integrated signals did hold constant over the course of the experiment
4	Solubility Testing for the Internal Standards	Approximate solubility measurements in deuterated sulfuric acid estimated for the eight internal standard candidates	These are estimated minimum solubilities (reported in mass per volume) in deuterated concentrated sulfuric acid
5	T1 Measurements	Measured T1 values for the compounds in this study from 2-D longitudinal relaxation time experiments using a 16-points variable list	The data presented here were analyzed with Dynamics Center processing software
6	Rate Constant for the Decarboxylation of Compound 9 Using Dimethyl Sulfone	NMR integration data and kinetics plots using dimethyl sulfone as the internal standard (3 trials)	Measurement of the first-order rate constant for decarboxylation of 3-methoxy-2,2-dimethyl-3-oxopropanoic acid in deuterated sulfuric acid
7	Rate Constant for the Decarboxylation of Compound 9 Using 1,4-Dinitrobenzene	NMR integration data and kinetics plots using 1,4-dinitrobenzene as the internal standard (3 trials)	Measurement of the first-order rate constant for decarboxylation of 3-methoxy-2,2-dimethyl-3-oxopropanoic acid in deuterated sulfuric acid
8	Rate Constant for the Decarboxylation of Compound 9 Using 2,3,4,5,6-Pentafluorotoluene	NMR integration data and kinetics plots using 2,3,4,5,6-pentafluorotoluene as the internal standard (1 trial)	Measurement of the first-order rate constant for decarboxylation of 3-methoxy-2,2-dimethyl-3-oxopropanoic acid in deuterated sulfuric acid
9	Rate Constant for the Decarboxylation of Compound 9 Using Potassium Hydrogen Phthalate	NMR integration data and kinetics plots using potassium hydrogen phthalate as the internal standard (1 trial)	Measurement of the first-order rate constant for decarboxylation of 3-methoxy-2,2-dimethyl-3-oxopropanoic acid in deuterated sulfuric acid
	Abbreviations	DMS = dimethyl sulfone; KHP = potassium hydrogen phthalate; DNB = 1,4-dinitrobenzene; PFT = 2,3,4,5,6-pentafluorotoluene; PK = peak; RT = room temperature (23 °C)
	Note on KHP	the 8.3 ppm peak from KHP was used as reference signal for that standard

## Sheet: 02-Stability of Int. Stds
	Thermal Stability Testing of the Candidate Internal Standards
		Integration	Room Temp.	50 °C	70 °C	100 °C
	Compounds	Area covered from [0–9]ppm	Peak integrated ±0.25	Peak integrated ±0.25	Peak integrated ±0.25	Peak integrated ±0.25
	dimethyl sulfone	1	0.9947	0.9947	0.9964	0.9956
	1,4-dinitrobenzene	1	0.9967	0.9933	0.9957	0.9995
	potasium hydrogen phthalate	1	0.9957	0.9977	0.9968	0.9999
	tetraphenylphosphonium bromide	1	0.9968	0.9966	0.9953	X
	1,4-dioxane	1	0.9937	0.9808	X	X
	pentafluorotoluene	1	0.9961	0.9954	0.995	0.9882
	duroquinone	1	0.9095	0.5959	X	X
	tetramethylsilane	X	X	X	X	X
				X = no test due to significant degradation at lower temperature

## Sheet: 03-Mixed Stability Test
Integration Data and Analysis from NMR Experiments on the Stability of KHP, DMS and DNB (mixed) at Various Temperatures
	RT-DAY1							Ratio						RT-DAY1							Ratio
	Trial 1		Trial 2		Trial 3		Trial 1	Trial 2	Trial 3					Trial 1		Trial 2		Trial 3		Trial 1	Trial 2	Trial 3
Ref. KHP	DNB	DMS	DNB	DMS	DNB	DMS	DMS/DNB	DMS/DNB	DMS/DNB				Ref. Dinitrobenzene	KHP	DMS	KHP	DMS	KHP	DMS	DMS/KHP	DMS/KHP	DMS/KHP
	1.6221	3.2859	1.5991	3.2315	1.5917	3.1886	2.02571	2.02082	2.00327					0.374	2.0257	0.3803	2.0208	0.3582	2.0033	5.41631	5.3137	5.59269
	RT-DAY3													RT-DAY3
	Trial 1		Trial 2		Trial 3		Trial 1	Trial 2	Trial 3					Trial 1		Trial 2		Trial 3		Trial 1	Trial 2	Trial 3			Ref. Dinitrobenzene		KHP	DMSul	DMSul/KHP	Ref. KHP	DNB	DMSul	DMSul/DNB
Ref. KHP	DNB	DMS	DNB	DMS	DNB	DMS	DMS/DNB	DMS/DNB	DMS/DNB				Ref. Dinitrobenzene	KHP	DMS	KHP	DMS	KHP	DMS	DMS/KHP	DMS/KHP	DMS/KHP				Day 1	0.3803	2.0208	5.3137	Day 1	1.5991	3.2315	2.02082
	1.5938	3.2183	1.6096	3.2518	1.6187	3.2486	2.01926	2.02025	2.00692					0.378	2.0193	0.3823	2.0203	0.3764	2.0069	5.34206	5.28459	5.33183				Day 7	0.3796	2.0276	5.34141	Day 7	1.5894	3.2226	2.02756
																										Day 1	0.3705	2.0207	5.45398	Day 1	1.595	3.2231	2.02075
	RT-DAY5													RT-DAY5												Day 7	0.3659	2.0319	5.55316	Day 7	1.6049	3.2609	2.03184
	Trial 1		Trial 2		Trial 3		Trial 1	Trial 2	Trial 3					Trial 1		Trial 2		Trial 3		Trial 1	Trial 2	Trial 3				Day 1	0.3486	2.0139	5.77711	Day 1	1.5919	3.2061	2.01401
Ref. KHP	DNB	DMS	DNB	DMS	DNB	DMS	DMS/DNB	DMS/DNB	DMS/DNB				Ref. Dinitrobenzene	KHP	DMS	KHP	DMS	KHP	DMS	DMS/KHP	DMS/KHP	DMS/KHP				Day 7	0.3401	2.0683	6.08145	Day 7	1.5602	3.2269	2.06826
	1.5253	3.0859	1.6116	3.2594	1.624	3.258	2.02314	2.02246	2.00616					0.3736	2.0231	0.3876	2.0225	0.3773	2.0061	5.41515	5.21801	5.31699				Day 1	0.3617	2.0301	5.61266	Day 1	1.6229	3.2948	2.03019
																										Day 7	0.4139	2.307	5.57381	Day 7	1.431	3.3013	2.30699
	RT-DAY7													RT-DAY7
	Trial 1		Trial 2		Trial 3		Trial 1	Trial 2	Trial 3					Trial 1		Trial 2		Trial 3		Trial 1	Trial 2	Trial 3
Ref. KHP	DNB	DMS	DNB	DMS	DNB	DMS	DMS/DNB	DMS/DNB	DMS/DNB				Ref. Dinitrobenzene	KHP	DMS	KHP	DMS	KHP	DMS	DMS/KHP	DMS/KHP	DMS/KHP
	1.6196	3.2633	1.5894	3.2226	1.6233	3.2573	2.01488	2.02756	2.00659					0.3649	2.0149	0.3796	2.0276	0.3703	2.0067	5.52179	5.34141	5.41912
	50-DAY1													50-DAY1
	Trial 1		Trial 2		Trial 3		Trial 1	Trial 2	Trial 3					Trial 1		Trial 2		Trial 3		Trial 1	Trial 2	Trial 3
Ref. KHP	DNB	DMS	DNB	DMS	DNB	DMS	DMS/DNB	DMS/DNB	DMS/DNB				Ref. Dinitrobenzene	KHP	DMS	KHP	DMS	KHP	DMS	DMS/KHP	DMS/KHP	DMS/KHP
	1.5983	3.2419	1.595	3.2231	1.4295	2.8903	2.02834	2.02075	2.0219					0.3746	2.0283	0.3705	2.0207	0.3948	2.0219	5.41458	5.45398	5.12133
	50-DAY3													50-DAY3
	Trial 1		Trial 2		Trial 3		Trial 1	Trial 2	Trial 3					Trial 1		Trial 2		Trial 3		Trial 1	Trial 2	Trial 3		Trial 1: Analysis with Relative Peak Integration
Ref. KHP	DNB	DMS	DNB	DMS	DNB	DMS	DMS/DNB	DMS/DNB	DMS/DNB				Ref. Dinitrobenzene	KHP	DMS	KHP	DMS	KHP	DMS	DMS/KHP	DMS/KHP	DMS/KHP			Temp./◦C	KHP	DNB	DMSul	DMSul/DNB	% change
	1.6032	3.2519	1.5952	3.2343	1.6146	3.2663	2.02838	2.02752	2.02298					0.3797	2.0284	0.379	2.0275	0.3786	2.0229	5.34211	5.3496	5.34311		Initial	23	1	1.6221	3.2859	2.02571
																								Day 7	23	1	1.6196	3.2633	2.01488	0.53449
	50-DAY5													50-DAY5										Initial	50	1	1.5983	3.2419	2.02834
	Trial 1		Trial 2		Trial 3		Trial 1	Trial 2	Trial 3					Trial 1		Trial 2		Trial 3		Trial 1	Trial 2	Trial 3		Day 7	50	1	1.0925	2.2735	2.08101	2.59642
Ref. KHP	DNB	DMS	DNB	DMS	DNB	DMS	DMS/DNB	DMS/DNB	DMS/DNB				Ref. Dinitrobenzene	KHP	DMS	KHP	DMS	KHP	DMS	DMS/KHP	DMS/KHP	DMS/KHP		Initial	70	1	1.6163	3.2782	2.02821
	1.5423	3.1218	1.6056	3.2642	1.5617	3.1646	2.02412	2.03301	2.02638					0.2484	2.0241	0.3732	2.0331	0.3395	2.0263	8.14855	5.44775	5.96848		Day 7	70	1	1.5934	3.2982	2.06991	2.05604
																								Initial	100	1	1.5983	3.2653	2.04298
	50-DAY7													50-DAY7										Day 7	100	1	1.4005	3.259	2.32703	13.9033
	Trial 1		Trial 2		Trial 3		Trial 1	Trial 2	Trial 3					Trial 1		Trial 2		Trial 3		Trial 1	Trial 2	Trial 3							AVG % change	4.77257
Ref. KHP	DNB	DMS	DNB	DMS	DNB	DMS	DMS/DNB	DMS/DNB	DMS/DNB				Ref. Dinitrobenzene	KHP	DMS	KHP	DMS	KHP	DMS	DMS/KHP	DMS/KHP	DMS/KHP
	1.0925	2.2735	1.6049	3.2609	1.6031	3.2593	2.08101	2.03184	2.03312					0.3022	2.081	0.3659	2.0319	0.3714	2.0332	6.88617	5.55316	5.47442
																								Trial 2: Analysis with Relative Peak Integration
																									Temp./◦C	KHP	DNB	DMSul	DMSul/DNB	% change
																								Initial	23	1	1.5991	3.2315	2.02082
	70-DAY1													70-DAY1										Day 7	23	1	1.5894	3.2226	2.02756	0.333198
	Trial 1		Trial 2		Trial 3		Trial 1	Trial 2	Trial 3					Trial 1		Trial 2		Trial 3		Trial 1	Trial 2	Trial 3		Initial	50	1	1.595	3.2231	2.02075
Ref. KHP	DNB	DMS	DNB	DMS	DNB	DMS	DMS/DNB	DMS/DNB	DMS/DNB				Ref. Dinitrobenzene	KHP	DMS	KHP	DMS	KHP	DMS	DMS/KHP	DMS/KHP	DMS/KHP		Day 7	50	1	1.6049	3.2609	2.03184	0.548689
	1.6163	3.2782	1.5919	3.2061	1.6192	3.2819	2.02821	2.01401	2.02687					0.3665	2.0282	0.3486	2.0139	0.3777	2.0269	5.53397	5.77711	5.36643		Initial	70	1	1.5919	3.2061	2.01401
																								Day 7	70	1	1.5602	3.2269	2.06826	2.69374
	70-DAY3													70-DAY3										Initial	100	1	1.6229	3.2948	2.03019
	Trial 1		Trial 2		Trial 3		Trial 1	Trial 2	Trial 3					Trial 1		Trial 2		Trial 3		Trial 1	Trial 2	Trial 3		Day 7	100	1	1.431	3.3013	2.30699	11.9981
Ref. KHP	DNB	DMS	DNB	DMS	DNB	DMS	DMS/DNB	DMS/DNB	DMS/DNB				Ref. Dinitrobenzene	KHP	DMS	KHP	DMS	KHP	DMS	DMS/KHP	DMS/KHP	DMS/KHP							AVG % change	3.89344
	1.5687	3.1794	1.6009	3.2552	1.5856	3.2404	2.02677	2.03336	2.04364					0.3778	2.0267	0.352	2.0334	0.3804	2.0437	5.36448	5.7767	5.3725
	70-DAY5													70-DAY5
	Trial 1		Trial 2		Trial 3		Trial 1	Trial 2	Trial 3					Trial 1		Trial 2		Trial 3		Trial 1	Trial 2	Trial 3		Trial 3: Analysis with Relative Peak Integration
Ref. KHP	DNB	DMS	DNB	DMS	DNB	DMS	DMS/DNB	DMS/DNB	DMS/DNB				Ref. Dinitrobenzene	KHP	DMS	KHP	DMS	KHP	DMS	DMS/KHP	DMS/KHP	DMS/KHP			Temp./◦C	KHP	DNB	DMSul	DMSul/DNB	% change
	1.5977	3.2627	1.5963	3.2625	1.5721	3.2386	2.04212	2.04379	2.06005					0.3717	2.0421	0.3808	2.0437	0.3605	2.0601	5.49395	5.36686	5.71456		Initial	23	1	1.5917	3.1886	2.00327
																								Day 7	23	1	1.6233	3.2573	2.00659	0.165957
	70-DAY7													70-DAY7										Initial	50	1	1.4295	2.8903	2.0219
	Trial 1		Trial 2		Trial 3		Trial 1	Trial 2	Trial 3					Trial 1		Trial 2		Trial 3		Trial 1	Trial 2	Trial 3		Day 7	50	1	1.6031	3.2593	2.03312	0.555298
Ref. KHP	DNB	DMS	DNB	DMS	DNB	DMS	DMS/DNB	DMS/DNB	DMS/DNB				Ref. Dinitrobenzene	KHP	DMS	KHP	DMS	KHP	DMS	DMS/KHP	DMS/KHP	DMS/KHP		Initial	70	1	1.6192	3.2819	2.02687
	1.5934	3.2982	1.5602	3.2269	1.5262	3.1344	2.06991	2.06826	2.05373					0.3735	2.0699	0.3401	2.0683	0.3699	2.0537	5.5419	6.08145	5.55204		Day 7	70	1	1.5262	3.1344	2.05373	1.32535
																								Initial	100	1	1.5703	3.1903	2.03165
																								Day 7	100	1	1.4419	3.2199	2.2331	9.91535
																													AVG % change	2.99049
	100-DAY1													100-DAY1
	Trial 1		Trial 2		Trial 3		Trial 1	Trial 2	Trial 3					Trial 1		Trial 2		Trial 3		Trial 1	Trial 2	Trial 3					Trial 1	Trial 2	Trial 3	Trial 1	Trial 2	Trial 3	AVERAGE FROM THE THREE TRIALS
Ref. KHP	DNB	DMS	DNB	DMS	DNB	DMS	DMS/DNB	DMS/DNB	DMS/DNB				Ref. Dinitrobenzene	KHP	DMS	KHP	DMS	KHP	DMS	DMS/KHP	DMS/KHP	DMS/KHP			Temp./◦C	KHP	DMSul/DNB	DMSul/DNB	DMSul/DNB	% change	% change	% change	AVG % change	Std deviation	Conf. Interval 95%
	1.5983	3.2653	1.6229	3.2948	1.5703	3.1903	2.04298	2.03019	2.03165					0.3704	2.043	0.3617	2.0301	0.3454	2.0316	5.51566	5.61266	5.88188		Initial	23	1	2.02571	2.02082	2.00327
																								Day 7	23	1	2.01488	2.02756	2.00659	0.53449	0.333198	0.165957	0.344548	0.184528	0.458394
	100-DAY3													100-DAY3										Initial	50	1	2.02834	2.02075	2.0219
	Trial 1		Trial 2		Trial 3		Trial 1	Trial 2	Trial 3					Trial 1		Trial 2		Trial 3		Trial 1	Trial 2	Trial 3		Day 7	50	1	2.08101	2.03184	2.03312	2.59642	0.548689	0.555298	1.23347	1.18035	2.93216
Ref. KHP	DNB	DMS	DNB	DMS	DNB	DMS	DMS/DNB	DMS/DNB	DMS/DNB				Ref. Dinitrobenzene	KHP	DMS	KHP	DMS	KHP	DMS	DMS/KHP	DMS/KHP	DMS/KHP		Initial	70	1	2.02821	2.01401	2.02687
	1.5631	3.2973	1.4817	3.0989	1.5605	3.268	2.10946	2.09145	2.0942					0.3916	2.1094	0.3901	2.0915	0.3858	2.0942	5.38662	5.36145	5.4282		Day 7	70	1	2.06991	2.06826	2.05373	2.05604	2.69374	1.32535	2.02504	0.684718	1.70093
																								Initial	100	1	2.04298	2.03019	2.03165
	100-DAY5													100-DAY5										Day 7	100	1	2.32703	2.30699	2.2331	13.9033	11.9981	9.91535	11.9389	1.99465	4.95499
	Trial 1		Trial 2		Trial 3		Trial 1	Trial 2	Trial 3					Trial 1		Trial 2		Trial 3		Trial 1	Trial 2	Trial 3
Ref. KHP	DNB	DMS	DNB	DMS	DNB	DMS	DMS/DNB	DMS/DNB	DMS/DNB				Ref. Dinitrobenzene	KHP	DMS	KHP	DMS	KHP	DMS	DMS/KHP	DMS/KHP	DMS/KHP
	1.5149	3.3354	1.5079	3.3135	1.429	3.2027	2.20173	2.19743	2.24122					0.395	2.2018	0.4028	2.1973	0.398	2.2411	5.57418	5.45506	5.6309
	100-DAY7													100-DAY7
	Trial 1		Trial 2		Trial 3		Trial 1	Trial 2	Trial 3					Trial 1		Trial 2		Trial 3		Trial 1	Trial 2	Trial 3
Ref. KHP	DNB	DMS	DNB	DMS	DNB	DMS	DMS/DNB	DMS/DNB	DMS/DNB				Ref. Dinitrobenzene	KHP	DMS	KHP	DMS	KHP	DMS	DMS/KHP	DMS/KHP	DMS/KHP
	1.4005	3.259	1.431	3.3013	1.4419	3.2199	2.32703	2.30699	2.2331					0.3971	2.3271	0.4139	2.307	0.3927	2.2332	5.86024	5.57381	5.68678

## Sheet: 04-Solubility
	Solubility Testing
	Compound	Minimum Concentration (mass/volume)	Notes
	dimethyl sulfone	> 70 mg/mL
	1,4-dinitrobenzene	> 40 mg/mL	lower solubility
	potasium hydrogen phthalate	> 60 mg/mL	lower solubility
	tetraphenylphosphonium bromide	> 70 mg/mL
	1,4-dioxane	> 70 mg/mL
	2,3,4,5,6-pentafluorotoluene	> 70 mg/mL
	duroquinone	> 70 mg/mL
	tetramethylsilane	> 50 mg/mL	lower solubility
	1 mg/μl = 0.001 mg/mL

## Sheet: 05-T1 Data Report
T1 Data Report
			Confidence Interval of Measured T1 values
Compound	Peaks (ppm)	T1 (sec)	95 % CI
3-methoxy-2,2-dimethyl-3-oxopropanoic	1.31, 3.77	0.304, 0.460	0.04310, 0.04825
dimethyl sulfone	2.77	0.634	0.08826
1,4-dinitrobenzene	8.02	1.36	0.04829
potassium hydrogen phthalate	7.48, 8.08	1.15, 0.73	0.06748, 0.09836
tetraphenylphosphonium bromide	7.01, 7.15,7.31	0.90, 0.94. 0.711	0.08687, 0.03152, 0.07836
1,4-dioxane	3.39	0.365	0.07448
2,3,4,5,6-pentafluorotoluene	1.35	0.888	0.04604
duroquinone	1.84	0.509	0.02055
tetramethylsilane	0	1.27	0.08288

## Sheet: 06-Kinetics Data DMS
	NMR Integration Data for the Decarboxylation of Compound 9 Using Dimethyl Sulfone as the Internal Standard
			Trial 1		Trial 2		Trial 3
	time/hrs	time/sec	Peak 1	Peak 2	Peak 1	Peak 2	Peak 1	Peak 2
	0.5	1800	1.8917	0.9826	1.9185	0.9973	1.8408	0.9569
	5.5	19800	1.7843	0.9257	1.7917	0.9319	1.7494	0.9039
	24	86400	1.4004	0.73	1.4183	0.7397	1.3801	0.7177
	48	172800	1.1174	0.5708	1.123	0.5794	1.1026	0.5701
	72	259200	0.8677	0.4467	0.8876	0.4579	0.8785	0.4528
	96	345600	0.6698	0.343	0.6872	0.3509	0.6874	0.3511
	Trial 1
	time/sec	Peak 1	Int-t/int-0	neg ln	t-diff		t-diff	neg ln
	1800	1.8917	1	0	0		0	0
	19800	1.7843	0.943226	0.0584497	18000		18000	0.0584497
	86400	1.4004	0.740287	0.300718	84600		84600	0.300718
	172800	1.1174	0.590686	0.526471	171000		171000	0.526471
	259200	0.8677	0.458688	0.779385	257400		257400	0.779385
	345600	0.6698	0.354073	1.03825	343800		343800	1.03825
		Trial 2
		Peak 1	Int-t/int-0	neg ln			t-diff	neg ln
		1.9185	1	0			0	0
		1.7917	0.933907	0.0683787			18000	0.0683787
		1.4183	0.739275	0.302085			84600	0.302085
		1.123	0.585353	0.53554			171000	0.53554
		0.8876	0.462653	0.770778			257400	0.770778
		0.6872	0.358197	1.02667			343800	1.02667
		Trial 3
		Peak 1	Int-t/int-0	neg ln			t-diff	neg ln
		1.8408	1	0			0	0
		1.7494	0.950348	0.0509274			18000	0.0509274
		1.3801	0.749728	0.288044			84600	0.288044
		1.1026	0.598979	0.512529			171000	0.512529
		0.8785	0.477238	0.73974			257400	0.73974
		0.6874	0.373425	0.985039			343800	0.985039
		Trial 1	Trial 2	Trial 3	AVG	stand.dev	95% Conf. Int.
	Peak 1	2.99e-06	2.94e-06	2.84e-06	2.92333e-06	7.63763e-08	6.86213e-07
		Trial 1
	time/sec	Peak 2	Int-t/int-0	neg ln	t-diff		t-diff	neg ln
	0	0.9826	1	0	0		0	0
	18000	0.9257	0.942092	0.0596519	18000		18000	0.0596519
	84600	0.73	0.742927	0.297158	84600		84600	0.297158
	171000	0.5708	0.580908	0.543163	171000		171000	0.543163
	257400	0.4467	0.45461	0.788315	257400		257400	0.788315
	343800	0.343	0.349074	1.05247	343800		343800	1.05247
		MIX 3
		Peak 2	Int-t/int-0	neg ln			t-diff	neg ln
		0.9973	1	0			0	0
		0.9319	0.934423	0.0678261			18000	0.0678261
		0.7397	0.741703	0.298807			84600	0.298807
		0.5794	0.580969	0.543059			171000	0.543059
		0.4579	0.45914	0.778401			257400	0.778401
		0.3509	0.35185	1.04455			343800	1.04455
		MIX 4
		Peak 2	Int-t/int-0	neg ln			t-diff	neg ln
		0.9569	1	0			0	0
		0.9039	0.944613	0.0569802			18000	0.0569802
		0.7177	0.750026	0.287647			84600	0.287647
		0.5701	0.595778	0.517887			171000	0.517887
		0.4528	0.473195	0.748248			257400	0.748248
		0.3511	0.366914	1.00263			343800	1.00263
		MIX 1	MIX 3	MIX 4	AVG	Std. Dev.	95% CI
	Peak 2	3.04e-06	2.99e-06	2.89e-06	2.97333e-06	7.63763e-08	6.86213e-07

## Sheet: 07-Kinetics Data DNB
	NMR Integration Data for the Decarboxylation of Compound 9 Using 1,4-Dinitrobenzene as the Internal Standard
			Trial 1		Trial 2		Trial 3
	time	time/sec	Peak 1	Peak 2	Peak 1	Peak 2	Peak 1	Peak 2
	0.5	1800	2.6097	1.3555	2.6558	1.3806	2.5171	1.3084
	5.5	19800	2.4567	1.2746	2.5433	1.3229	2.3927	1.2363
	24	86400	1.9291	1.0056	1.9653	1.0249	1.8921	0.9839
	48	172800	1.538	0.7857	1.5506	0.8	1.5116	0.7816
	72	259200	1.1946	0.6151	1.2306	0.6349	1.2014	0.6192
	96	345600	0.9189	0.4705	0.9542	0.4873	0.9407	0.4806
	Trial 1
	time/sec	Peak 1	Int-t/int-0	neg ln			t-diff	neg ln
	0	2.6097	1	0			0	0
	19800	2.4567	0.941373	0.0604163			18000	0.0604163
	86400	1.9291	0.739204	0.302182			84600	0.302182
	172800	1.538	0.58934	0.528752			171000	0.528752
	259200	1.1946	0.457754	0.781424			257400	0.781424
	345600	0.9189	0.352109	1.04381			343800	1.04381
		Trial 2
		Peak 1	Int-t/int-0	neg ln			t-diff	neg ln
		2.6558	1	0			0	0
		2.5433	0.95764	0.0432835			18000	0.0432835
		1.9653	0.740003	0.301101			84600	0.301101
		1.5506	0.583854	0.538104			171000	0.538104
		1.2306	0.463363	0.769244			257400	0.769244
		0.9542	0.359289	1.02363			343800	1.02363
		Trial 3
		Peak 1	Int-t/int-0	neg ln			t-diff	neg ln
		2.5171	1	0			0	0
		2.3927	0.950578	0.050685			18000	0.050685
		1.8921	0.751698	0.28542			84600	0.28542
		1.5116	0.600532	0.509939			171000	0.509939
		1.2014	0.477295	0.73962			257400	0.73962
		0.9407	0.373724	0.984238			343800	0.984238
			MIX 1	MIX 3	MIX 4	AVG	Std. Dev.	95% CI
		Peak 1	3e-06	2.97e-06	2.84e-06	2.93667e-06	8.5049e-08	7.64135e-07
		Trial 1
		Peak 2	Int-t/int-0	neg ln			t-diff	neg ln
		1.3555	1	0			0	0
		1.2746	0.940317	0.061538			18000	0.061538
		1.0056	0.741866	0.298586			84600	0.298586
		0.7857	0.579639	0.545351			171000	0.545351
		0.6151	0.453781	0.790141			257400	0.790141
		0.4705	0.347104	1.05813			343800	1.05813
		Trial 2
		Peak 2	Int-t/int-0	neg ln			t-diff	neg ln
		1.3806	1	0			0	0
		1.3229	0.958207	0.0426919			18000	0.0426919
		1.0249	0.742358	0.297923			84600	0.297923
		0.8	0.579458	0.545662			171000	0.545662
		0.6349	0.459873	0.776806			257400	0.776806
		0.4873	0.352962	1.04139			343800	1.04139
		Trial 3
		Peak 2	Int-t/int-0	neg ln			t-diff	neg ln
		1.3084	1	0			0	0
		1.2363	0.944895	0.056682			18000	0.056682
		0.9839	0.751987	0.285036			84600	0.285036
		0.7816	0.597371	0.515217			171000	0.515217
		0.6192	0.47325	0.748132			257400	0.748132
		0.4806	0.367319	1.00152			343800	1.00152
			MIX 1	MIX 3	MIX 4	AVG	Std. Dev.	95% CI
		Peak 2	3.05e-06	3.02e-06	2.88e-06	2.98333e-06	9.07377e-08	8.15246e-07

## Sheet: 08-Kinetics Data PFT
	NMR Integration Data for the Decarboxylation of Compound 9 Using 2,3,4,5,6-Pentafluorotoluene as the Internal Standard
	time/hrs	time/sec	Peak 1	Peak 2
	0.5	1800	6.2374	3.241
	5.5	19800	6.3391	3.2797
	24	86400	5.0515	2.6047
	48	172800	4.5175	2.3215
	72	259200	3.5522	1.8143
	96	345600	2.1664	4.2504
		pk 1=1.3	pk 2=3.8
	time/sec	Peak 1	Int-t/int-0	neg ln		t/diff	neg ln
	1800	6.2374	1	0		0	0
	19800	6.3391	1.0163	-0.0161734		18000	-0.0161734
	86400	5.0515	0.809873	0.210878		84600	0.210878
	172800	4.5175	0.72426	0.322605		171000	0.322605
	259200	3.5522	0.5695	0.562996		257400	0.562996
	345600	4.2504	0.681438	0.38355		343800	0.38355
	time/sec	Peak 2	Int-t/int-0	neg ln		t/diff	neg ln
	1800	3.241	1	0		0	0
	19800	3.2797	1.01194	-0.01187		18000	-0.01187
	86400	2.6047	0.803672	0.218564		84600	0.218564
	172800	2.3215	0.716291	0.333668		171000	0.333668
	259200	1.8143	0.559796	0.580182		257400	0.580182
	345600	2.1664	0.668436	0.402815		343800	0.402815

## Sheet: 09-Kinetics Data KHP
		NMR Integration Data for the Decarboxylation of Compound 9 Using Potassium Hydrogen Phthalate as the Internal Standard
		time/hrs	time/sec	Peak 1	Peak 2
		0.5	1800	9.8821	5.0946
		5.5	19800	9.6937	5.0153
		24	86400	10.207	5.263
		48	172800	3.6305	1.8657
		72	259200	2.7836	1.4217
		96	345600	2.1041	1.0724
		time/sec	time/sec	Peak 1	Int-t/int-0	neg ln		t/diff	neg ln
		1800	1800	9.8821	1	0		0	0
		19800	19800	9.6937	0.980935	0.0192488		18000	0.0192488
		86400	86400	10.207	1.03288	-0.0323487		84600	-0.0323487
		172800	172800	3.6305	0.367381	1.00135		171000	1.00135
		259200	259200	2.7836	0.281681	1.26698		257400	1.26698
		345600	345600	2.1041	0.21292	1.54684		343800	1.54684
		time/sec	time/sec	Peak 2	Int-t/int-0	neg ln		t/diff	neg ln
		1800	1800	5.0946	1	0		0	0
		19800	19800	5.0153	0.984434	0.0156879		18000	0.0156879
		86400	86400	5.263	1.03305	-0.0325201		84600	-0.0325201
		172800	172800	1.8657	0.366211	1.00454		171000	1.00454
		259200	259200	1.4217	0.27906	1.27633		257400	1.27633
		345600	345600	1.0724	0.210497	1.55828		343800	1.55828
